# Supplementary material
Source: publisher site journal article supplement (https://www.dovepress.com/get_supplementary_file.php?f=326818.xlsx)
Supplement: Supplementary file 1 [file get_supplementary_file.php]

## Sheet: Supplementary Table 1
Supplementary Table 1. Significant genome-wide loci associated with sleep health score
CHROM	POS	SNP	Gene	BETA	SE	P	Bonferroni adjusted p-values
2	66750564	rs113851554	MEIS1	-0.0402297	0.0053053	3.38727e-14	1.47e-08
6	41768510	rs10498752	USP49	-0.0156537	0.00237245	4.17103e-11	1.49e-05
6	41753380	rs3747753	FRS3	0.0151839	0.00237578	1.649e-10	5.88e-05
7	102604857	rs375365692	FBXL13	0.0552385	0.00866147	1.80239e-10	5.63e-05
8	8867411	rs2915251	ERI1	0.0149081	0.0023932	4.68911e-10	0.000134114
3	77321570	rs11924337	ROBO2	0.016536	0.00266577	5.54305e-10	0.000206253
6	41888827	rs2274578	MED20	0.0146559	0.00237633	6.94665e-10	0.000247493
11	47441472	rs3781627	PSMC3	0.016013	0.00261835	9.62541e-10	0.000253196
1	15916897	rs112536793	DNAJC16	0.0174566	0.00289266	1.59341e-09	0.000646605
1	15925487	rs6693189	AL121992.1	0.0172601	0.00288951	2.32612e-09	0.000943936
11	47387213	rs778616340	SPI1	0.015338	0.00257108	2.43983e-09	0.000641794
11	47423553	rs4752832	AC090559.1	0.015065	0.00253767	2.91378e-09	0.000766467
1	15956610	rs72647119	DDI2	0.0171069	0.00289006	3.23797e-09	0.00131397
1	201801011	rs2494114	IPO9	-0.0147581	0.00251833	4.62486e-09	0.00187676
1	15941276	rs3940061	CD24P1	0.0154849	0.00267045	6.69289e-09	0.00271597
1	87728007	rs4262519	AC099062.1	-0.0138958	0.00239699	6.75001e-09	0.00273915
1	16049944	rs551937417	PLEKHM2	-0.0145154	0.00252489	8.98994e-09	0.00364811
5	135495334	rs35711851	SMAD5	-0.0148227	0.00258409	9.69434e-09	0.00335052
8	8820969	rs6994163	RPL10P19	0.0141812	0.00248044	1.08381e-08	0.00309982
11	47825735	rs562168683	NUP160	0.0147187	0.00257721	1.12351e-08	0.00295538
6	31540757	rs2229092	LTA	-0.0276261	0.00491311	1.87902e-08	0.00669452
9	86368660	rs7047907	GKAP1	0.0152437	0.00272272	2.16144e-08	0.00493378
9	86595498	rs296888	HNRNPK	0.015195	0.00272371	2.42423e-08	0.00553365
6	41915143	rs6913232	CCND3	0.0133554	0.0023959	2.48775e-08	0.00886329
9	86598190	rs296893	RMI1	0.015159	0.00272335	2.60363e-08	0.00594315
3	50466479	rs114397936	CACNA2D2	-0.0403578	0.00726296	2.75199e-08	0.01024
12	24065162	rs4473020	SOX5	0.014141	0.00254666	2.81365e-08	0.00712463
9	86474591	rs10115817	AL354733.2	0.0157621	0.00284378	2.98169e-08	0.00680612
17	65470083	rs2949917	PITPNC1	0.013239	0.00241169	4.03314e-08	0.00557457
8	8098038	rs2945232	FAM86B3P	0.0131225	0.00239155	4.0906e-08	0.0116996
8	9029413	rs435581	AC022784.1	-0.0130502	0.0023812	4.24421e-08	0.0121389
11	47461263	rs3972616	RAPSN	0.0132266	0.00242209	4.74231e-08	0.0124746
Notes: SNP: Single nucleotide polymorphism; BETA: Beta value; SE: Standard Error value.

## Sheet: Supplementary Table 2
Supplementary Table 2. Comparisons between our GWAS study results with previous comparable study results
Candidate gene reported by this study				Candidate gene reported by previous study
Gene	Trait	P value		Trait	P value	Reference	Trait	P value	Reference	Trait	P value	Reference	Trait	P value	Reference	Trait	P value	Reference
MEIS1	sleep health score	3.38727e-14		sleep duration	-	[1]	chronotype (morningness)	-	[2]	snoring	-	[2]	daytime dozing	-	[2]	insomnia	1.3e-41	[3]
USP49	sleep health score	4.17103e-11		sleep duration	-	[1]	chronotype (morningness)	-	[2]	snoring	-	[2]	daytime dozing	-	[2]	insomnia	-	[3]
FRS3	sleep health score	1.649e-10		sleep duration	-	[1]	chronotype (morningness)	-	[2]	snoring	-	[2]	daytime dozing	-	[2]	insomnia	-	[3]
FBXL13	sleep health score	1.80239e-10		sleep duration	-	[1]	chronotype (morningness)	5.522e-12	[2]	snoring	-	[2]	daytime dozing	-	[2]	insomnia	-	[3]
ERI1	sleep health score	4.68911e-10		sleep duration	-	[1]	chronotype (morningness)	-	[2]	snoring	-	[2]	daytime dozing	-	[2]	insomnia	-	[3]
ROBO2	sleep health score	5.54305e-10		sleep duration	-	[1]	chronotype (morningness)	3.515e-09	[2]	snoring	5.65e-09	[2]	daytime dozing	-	[2]	insomnia	-	[3]
MED20	sleep health score	6.94665e-10		sleep duration	-	[1]	chronotype (morningness)	-	[2]	snoring	-	[2]	daytime dozing	-	[2]	insomnia	-	[3]
PSMC3	sleep health score	9.62541e-10		sleep duration	-	[1]	chronotype (morningness)	-	[2]	snoring	-	[2]	daytime dozing	-	[2]	insomnia	2.5e-09	[3]
DNAJC16	sleep health score	1.59341e-09		sleep duration	-	[1]	chronotype (morningness)	1.425e-08	[2]	snoring	-	[2]	daytime dozing	-	[2]	insomnia	-	[3]
AL121992.1	sleep health score	2.32612e-09		sleep duration	-	[1]	chronotype (morningness)	7.4e-09	[2]	snoring	-	[2]	daytime dozing	-	[2]	insomnia	-	[3]
SPI1	sleep health score	2.43983e-09		sleep duration	-	[1]	chronotype (morningness)	-	[2]	snoring	-	[2]	daytime dozing	-	[2]	insomnia	-	[3]
AC090559.1	sleep health score	2.91378e-09		sleep duration	-	[1]	chronotype (morningness)	-	[2]	snoring	-	[2]	daytime dozing	-	[2]	insomnia	-	[3]
DDI2	sleep health score	3.23797e-09		sleep duration	-	[1]	chronotype (morningness)	1.745e-09	[2]	snoring	-	[2]	daytime dozing	-	[2]	insomnia	-	[3]
IPO9	sleep health score	4.62486e-09		sleep duration	-	[1]	chronotype (morningness)	-	[2]	snoring	-	[2]	daytime dozing	-	[2]	insomnia	-	[3]
CD24P1	sleep health score	6.69289e-09		sleep duration	-	[1]	chronotype (morningness)	9.916e-09	[2]	snoring	-	[2]	daytime dozing	-	[2]	insomnia	-	[3]
AC099062.1	sleep health score	6.75001e-09		sleep duration	-	[1]	chronotype (morningness)	-	[2]	snoring	-	[2]	daytime dozing	-	[2]	insomnia	-	[3]
PLEKHM2	sleep health score	8.98994e-09		sleep duration	-	[1]	chronotype (morningness)	-	[2]	snoring	-	[2]	daytime dozing	-	[2]	insomnia	-	[3]
SMAD5	sleep health score	9.69434e-09		sleep duration	-	[1]	chronotype (morningness)	-	[2]	snoring	-	[2]	daytime dozing	-	[2]	insomnia	9.9e-12	[3]
RPL10P19	sleep health score	1.08381e-08		sleep duration	2.2e-08	[1]	chronotype (morningness)	-	[2]	snoring	-	[2]	daytime dozing	-	[2]	insomnia	-	[3]
NUP160	sleep health score	1.12351e-08		sleep duration	-	[1]	chronotype (morningness)	-	[2]	snoring	-	[2]	daytime dozing	-	[2]	insomnia	-	[3]
LTA	sleep health score	1.87902e-08		sleep duration	-	[1]	chronotype (morningness)	-	[2]	snoring	-	[2]	daytime dozing	-	[2]	insomnia	-	[3]
GKAP1	sleep health score	2.16144e-08		sleep duration	-	[1]	chronotype (morningness)	-	[2]	snoring	-	[2]	daytime dozing	-	[2]	insomnia	-	[3]
HNRNPK	sleep health score	2.42423e-08		sleep duration	-	[1]	chronotype (morningness)	-	[2]	snoring	-	[2]	daytime dozing	-	[2]	insomnia	-	[3]
CCND3	sleep health score	2.48775e-08		sleep duration	-	[1]	chronotype (morningness)	-	[2]	snoring	-	[2]	daytime dozing	-	[2]	insomnia	-	[3]
RMI1	sleep health score	2.60363e-08		sleep duration	-	[1]	chronotype (morningness)	-	[2]	snoring	-	[2]	daytime dozing	-	[2]	insomnia	-	[3]
CACNA2D2	sleep health score	2.75199e-08		sleep duration	-	[1]	chronotype (morningness)	9.836e-09	[2]	snoring	-	[2]	daytime dozing	-	[2]	insomnia	-	[3]
SOX5	sleep health score	2.81365e-08		sleep duration	-	[1]	chronotype (morningness)	3.592e-08	[2]	snoring	-	[2]	daytime dozing	-	[2]	insomnia	-	[3]
AL354733.2	sleep health score	2.98169e-08		sleep duration	-	[1]	chronotype (morningness)	-	[2]	snoring	-	[2]	daytime dozing	-	[2]	insomnia	-	[3]
PITPNC1	sleep health score	4.03314e-08		sleep duration	-	[1]	chronotype (morningness)	4.413e-09	[2]	snoring	-	[2]	daytime dozing	-	[2]	insomnia	-	[3]
FAM86B3P	sleep health score	4.0906e-08		sleep duration	-	[1]	chronotype (morningness)	-	[2]	snoring	-	[2]	daytime dozing	-	[2]	insomnia	-	[3]
AC022784.1	sleep health score	4.24421e-08		sleep duration	2.7e-10	[1]	chronotype (morningness)	-	[2]	snoring	-	[2]	daytime dozing	-	[2]	insomnia	-	[3]
RAPSN	sleep health score	4.74231e-08		sleep duration	-	[1]	chronotype (morningness)	-	[2]	snoring	-	[2]	daytime dozing	-	[2]	insomnia	-	[3]
Note: All of the GWASs were conducted among the UK biobank population.
[1] Dashti HS, Jones SE, Wood AR, Lane JM, van Hees VT, Wang H, Rhodes JA, Song Y, Patel K, Anderson SG, Beaumont RN, Bechtold DA, Bowden J, Cade BE, Garaulet M, Kyle SD, Little MA, Loudon AS, Luik AI, Scheer FAJL, Spiegelhalder K, Tyrrell J, Gottlieb DJ, Tiemeier H, Ray DW, Purcell SM, Frayling TM, Redline S, Lawlor DA, Rutter MK, Weedon MN, Saxena R. Genome-wide association study identifies gen…
[2] Jansen PR, Watanabe K, Stringer S, Skene N, Bryois J, Hammerschlag AR, de Leeuw CA, Benjamins JS, Muñoz-Manchado AB, Nagel M, Savage JE, Tiemeier H, White T; 23andMe Research Team, Tung JY, Hinds DA, Vacic V, Wang X, Sullivan PF, van der Sluis S, Polderman TJC, Smit AB, Hjerling-Leffler J, Van Someren EJW, Posthuma D. Genome-wide analysis of insomnia in 1,331,010 individuals identifies new ri…
[3] Lane JM, Jones SE, Dashti HS, Wood AR, Aragam KG, van Hees VT, Strand LB, Winsvold BS, Wang H, Bowden J, Song Y, Patel K, Anderson SG, Beaumont RN, Bechtold DA, Cade BE, Haas M, Kathiresan S, Little MA, Luik AI, Loudon AS, Purcell S, Richmond RC, Scheer FAJL, Schormair B, Tyrrell J, Winkelman JW, Winkelmann J; HUNT All In Sleep, Hveem K, Zhao C, Nielsen JB, Willer CJ, Redline S, Spiegelhalder…
